# Supplementary material for: Assessing patiromer utilization and associated serum potassium changes in US veterans with prior sodium polystyrene sulfonate exposure
Source: PubMed Central journal article supplement — Medicine (Baltimore). 2023 Mar 3;102(9):e33134. doi: 10.1097/MD.0000000000033134 (PMC9981426; doi:10.1097/md.0000000000033134), 2023-03-03
Supplement: medi-102-e33134-s001.pdf [file medi-102-e33134-s001.pdf]

Supplemental Table 1. ICD-9 and ICD-10 diagnostic codes used in study

| <b>Concept</b> | <b>ICD Version</b> | <b>ICD Code</b> | <b>ICD Description</b>                       |
|----------------|--------------------|-----------------|----------------------------------------------|
| CKD            | ICD-9-CM           | 585.1           | Chronic kidney disease, stage I              |
| CKD            | ICD-9-CM           | 585.2           | Chronic kidney disease, stage II (mild)      |
| CKD            | ICD-9-CM           | 585.3           | Chronic kidney disease, stage III (moderate) |
| CKD            | ICD-9-CM           | 585.4           | Chronic kidney disease, stage IV (severe)    |
| CKD            | ICD-9-CM           | 585.9           | Chronic kidney disease, unspecified          |
| CKD            | ICD-10-CM          | N18.1           | Chronic kidney disease, stage 1              |
| CKD            | ICD-10-CM          | N18.2           | Chronic kidney disease, stage 2 (mild)       |
| CKD            | ICD-10-CM          | N18.3           | Chronic kidney disease, stage 3 (moderate)   |
| CKD            | ICD-10-CM          | N18.30          | Chronic kidney disease, stage 3 unspecified  |
| CKD            | ICD-10-CM          | N18.31          | Chronic kidney disease, stage 3a             |
| CKD            | ICD-10-CM          | N18.32          | Chronic kidney disease, stage 3b             |
| CKD            | ICD-10-CM          | N18.4           | Chronic kidney disease, stage 4 (severe)     |
| CKD            | ICD-10-CM          | N18.9           | Chronic kidney disease, unspecified          |
| ESKD           | ICD-9-CM           | 585.6           | End stage kidney disease                     |
| ESKD           | ICD-10-CM          | N18.6           | End stage kidney disease                     |

ICD-9 = International Classification of Diseases, Ninth Revision; ICD-10 = International Classification of Diseases, Tenth Revision
