# Supplementary material for: Assessing patiromer utilization and associated serum potassium changes in US veterans with prior sodium polystyrene sulfonate exposure
Source: PubMed Central journal article supplement — Medicine (Baltimore). 2023 Mar 3;102(9):e33134. doi: 10.1097/MD.0000000000033134 (PMC9981426; doi:10.1097/md.0000000000033134), 2023-03-03
Supplement: medi-102-e33134-s002.pdf [file medi-102-e33134-s002.pdf]

Supplemental Table 2. Logical Observation Identifiers Names and Codes (LOINC) for Serum Potassium

| <b>LOINC Code</b> | <b>LOINC Description</b>                       |
|-------------------|------------------------------------------------|
| 75940-7           | Potassium [Mass/volume] in Blood               |
| 12812-4           | Potassium [Moles/volume] in Serum or Plasma    |
| 12813-2           | Potassium [Moles/volume] in Serum or Plasma    |
| 22760-3           | Potassium [Mass/volume] in Serum or Plasma     |
| 2823-3            | Potassium [Moles/volume] in Serum or Plasma    |
| 2824-1            | Potassium [Moles/volume] in Red Blood Cells    |
| 29349-8           | Potassium [Moles/volume] in Serum or Plasma    |
| 32713-0           | Potassium [Moles/volume] in Arterial blood     |
| 39789-3           | Potassium [Moles/volume] in Venous blood       |
| 39790-1           | Potassium [Moles/volume] in Capillary blood    |
| 41656-0           | Potassium [Moles/volume] in Mixed venous blood |
| 51618-7           | Potassium [Moles/volume] in Serum or Plasma    |
