# Supplementary material for: Assessing patiromer utilization and associated serum potassium changes in US veterans with prior sodium polystyrene sulfonate exposure
Source: PubMed Central journal article supplement — Medicine (Baltimore). 2023 Mar 3;102(9):e33134. doi: 10.1097/MD.0000000000033134 (PMC9981426; doi:10.1097/md.0000000000033134), 2023-03-03
Supplement: medi-102-e33134-s003.pdf [file medi-102-e33134-s003.pdf]

Supplemental Figure 1. Study attrition and cohort development diagram. SPS = sodium polystyrene sulfonate, CKD = chronic kidney disease, ESKD = end stage kidney disease

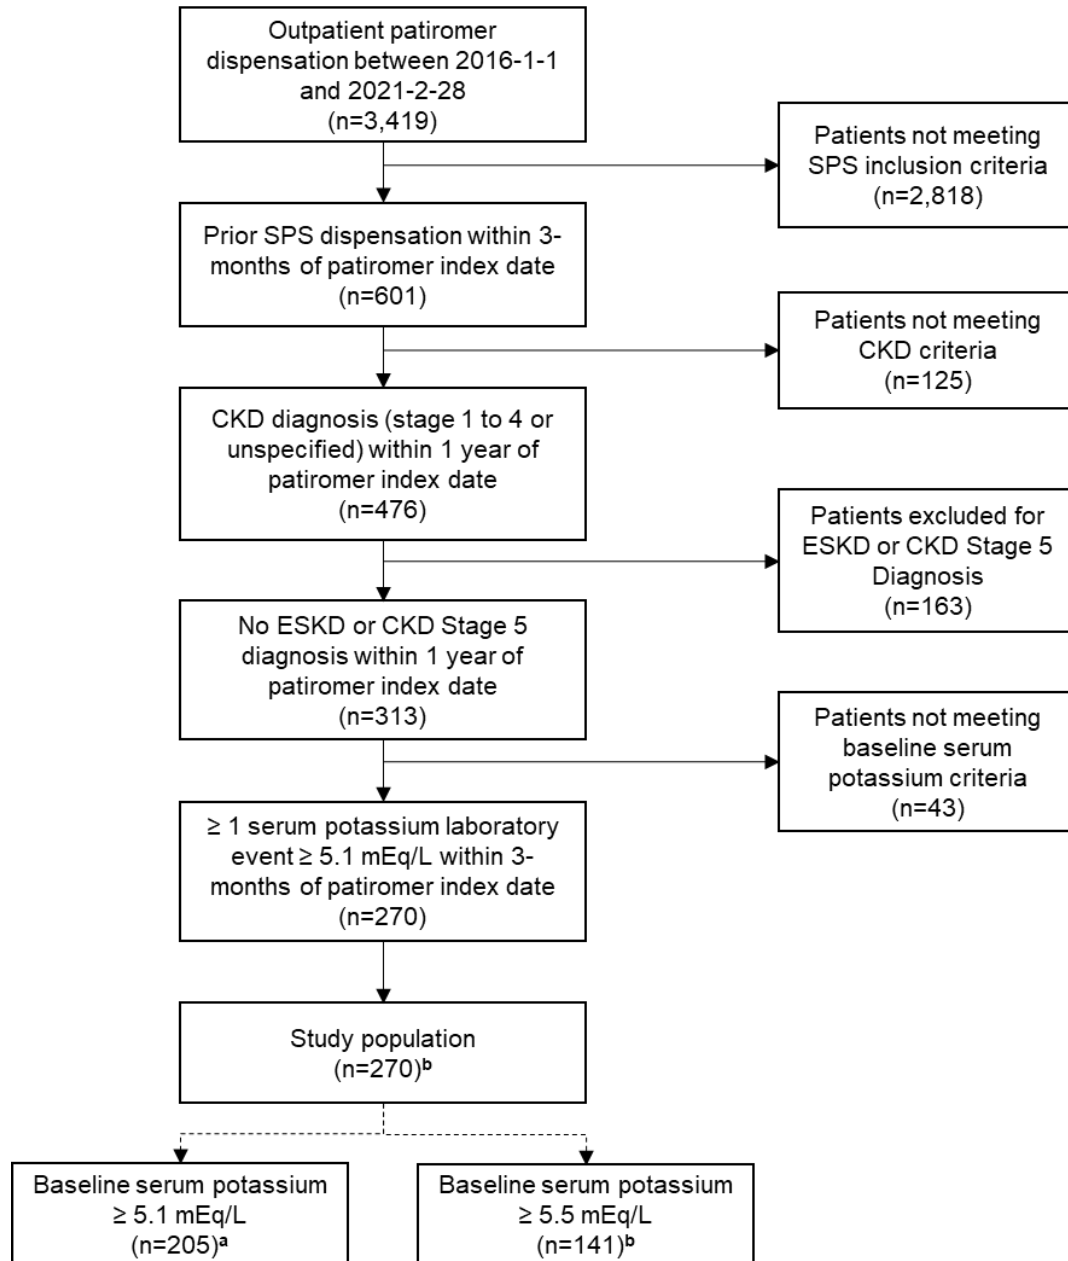

<sup>a</sup> Primary analysis cohort

<sup>b</sup> Secondary analysis cohorts
