# Supplementary material for: Assessing patiromer utilization and associated serum potassium changes in US veterans with prior sodium polystyrene sulfonate exposure
Source: PubMed Central journal article supplement — Medicine (Baltimore). 2023 Mar 3;102(9):e33134. doi: 10.1097/MD.0000000000033134 (PMC9981426; doi:10.1097/md.0000000000033134), 2023-03-03
Supplement: medi-102-e33134-s005.pdf [file medi-102-e33134-s005.pdf]

Supplemental Table 3. Summary of patiromer dispensing and drug courses in the full study population

|                                                                                               | Study Cohort<br>(n= 270)               |          |                |
|-----------------------------------------------------------------------------------------------|----------------------------------------|----------|----------------|
|                                                                                               | <u>Mean</u>                            |          | <u>95% CI</u>  |
| Patiromer dispensing events                                                                   | 2.77                                   |          | 2.55-2.99      |
| Cumulative dosage dispensed (g)                                                               | 994.65                                 |          | 878.35-1110.96 |
| Day supply per dispensing                                                                     | 38.94                                  |          | 36.33-41.56    |
|                                                                                               |                                        |          |                |
|                                                                                               | Patiromer treatment courses<br>(c=334) |          |                |
|                                                                                               | <u>Mean</u>                            |          | <u>95% CI</u>  |
| Number of drug courses                                                                        | 1.24                                   |          | 1.18-1.29      |
|                                                                                               | <u>n</u>                               | <u>%</u> |                |
| Patients with 1 course                                                                        | 209                                    | 77.4     |                |
| Patients with > 1 course                                                                      | 61                                     | 22.6     |                |
|                                                                                               | <u>Mean</u>                            |          | <u>95% CI</u>  |
| Course duration (days)                                                                        | 75.76                                  |          | 69.47-82.04    |
| Average prescribed daily dose (g)                                                             | 9.22                                   |          | 8.8-9.64       |
| Average observed daily dose (g)                                                               | 9.4                                    |          | 8.8-10         |
| Course PDC                                                                                    | 0.95                                   |          | 0.94-0.96      |
|                                                                                               | <u>n</u>                               | <u>%</u> |                |
| Active course at the end of follow up time                                                    | 83                                     | 24.9     |                |
| Courses with death date recorded during drug course                                           | 6                                      | 1.8      |                |
| Censored courses at the end of follow up time <sup>a</sup>                                    | 89                                     | 26.7     |                |
|                                                                                               |                                        |          |                |
| Median course duration (days)                                                                 | 65                                     |          | 60-73          |
| PDC = proportion of days covered                                                              |                                        |          |                |
| <sup>a</sup> Including active courses and courses with patient death date during drug course. |                                        |          |                |
