# Supplementary material for: Assessing patiromer utilization and associated serum potassium changes in US veterans with prior sodium polystyrene sulfonate exposure
Source: PubMed Central journal article supplement — Medicine (Baltimore). 2023 Mar 3;102(9):e33134. doi: 10.1097/MD.0000000000033134 (PMC9981426; doi:10.1097/md.0000000000033134), 2023-03-03

Supplemental Figure 3. Patiromer persistence probability for all courses in the full study population

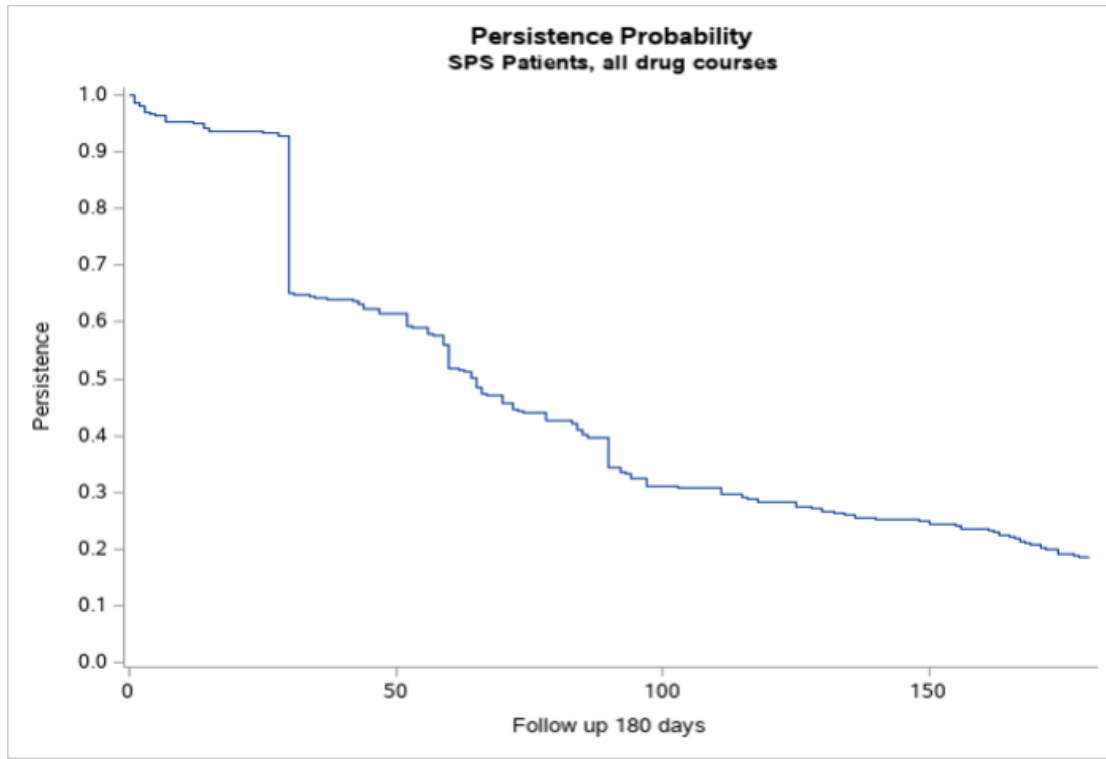

Supplement: medi-102-e33134-s006.pdf [file medi-102-e33134-s006.pdf]
