# Supplementary material for: Assessing patiromer utilization and associated serum potassium changes in US veterans with prior sodium polystyrene sulfonate exposure
Source: PubMed Central journal article supplement — Medicine (Baltimore). 2023 Mar 3;102(9):e33134. doi: 10.1097/MD.0000000000033134 (PMC9981426; doi:10.1097/md.0000000000033134), 2023-03-03
Supplement: medi-102-e33134-s007.pdf [file medi-102-e33134-s007.pdf]

Supplemental Table 4. Serum potassium distributions by category and study interval in the full study population

|                                      | Study Cohort<br>(n = 270) |      |               |         |
|--------------------------------------|---------------------------|------|---------------|---------|
| Baseline                             | Mean (95% CI)             |      | Median (IQR)  | p-value |
| K+ value <sup>a</sup>                | 5.45 (5.38-5.53)          |      | 5.5 (5.1-5.9) |         |
| K+ categories                        | n                         | %    |               |         |
| K+ < 3.5                             | 0                         | 0    |               |         |
| K+ 3.5 - 5.0                         | 65                        | 24.1 |               |         |
| K+ 5.1 - 5.4                         | 64                        | 23.7 |               |         |
| K+ 5.5 -5.9                          | 91                        | 33.7 |               |         |
| K+ >= 6.0                            | 50                        | 18.5 |               |         |
| K+ Missing                           | 0                         | 0    |               |         |
| Follow up 1-30 days.                 |                           |      |               |         |
| K+ value <sup>a</sup>                | 4.94 (4.85-5.02)          |      | 4.9 (4.6-5.4) |         |
| K+ change from baseline <sup>b</sup> | -0.61 (0.49-0.73)         |      |               | <0.01   |
| K+ categories                        | n                         | %    |               |         |
| K+ < 3.5                             | 1                         | 0.4  |               |         |
| K+ 3.5 - 5.0                         | 102                       | 37.8 |               |         |
| K+ 5.1 - 5.4                         | 44                        | 16.3 |               |         |
| K+ 5.5 -5.9                          | 31                        | 11.5 |               |         |
| K+ >= 6.0                            | 3                         | 1.1  |               |         |
| K+ Missing                           | 89                        | 33.0 |               |         |
| Follow up 31-91 days.                |                           |      |               |         |
| K+ value                             | 4.88 (4.8-4.97)           |      | 4.9 (4.6-5.3) |         |
| K+ change from baseline              | -0.57 (0.45-0.68)         |      |               | <0.01   |
| K+ categories                        | n                         | %    |               |         |
| K+ < 3.5                             | 1                         | 0.4  |               |         |
| K+ 3.5 - 5.0                         | 123                       | 45.6 |               |         |
| K+ 5.1 - 5.4                         | 45                        | 16.7 |               |         |
| K+ 5.5 -5.9                          | 22                        | 8.1  |               |         |
| K+ >= 6.0                            | 9                         | 3.3  |               |         |
| K+ Missing                           | 70                        | 25.9 |               |         |

|                                                                                                                                                                                                                                                                                                                     |                   |               |       |
|---------------------------------------------------------------------------------------------------------------------------------------------------------------------------------------------------------------------------------------------------------------------------------------------------------------------|-------------------|---------------|-------|
| Follow up 92-182 days.                                                                                                                                                                                                                                                                                              |                   |               |       |
| K+ value                                                                                                                                                                                                                                                                                                            | 4.89 (4.8-4.97)   | 4.9 (4.5-5.3) |       |
| K+ change from baseline                                                                                                                                                                                                                                                                                             | -0.59 (0.47-0.71) |               | <0.01 |
| K+ categories                                                                                                                                                                                                                                                                                                       | n                 | %             |       |
| K+ < 3.5                                                                                                                                                                                                                                                                                                            | 2                 | 0.7           |       |
| K+ 3.5 - 5.0                                                                                                                                                                                                                                                                                                        | 136               | 50.4          |       |
| K+ 5.1 - 5.4                                                                                                                                                                                                                                                                                                        | 41                | 15.2          |       |
| K+ 5.5 -5.9                                                                                                                                                                                                                                                                                                         | 23                | 8.5           |       |
| K+ >= 6.0                                                                                                                                                                                                                                                                                                           | 12                | 4.4           |       |
| K+ Missing                                                                                                                                                                                                                                                                                                          | 56                | 20.7          |       |
| <p><sup>a</sup> Average of K+ values that were closest to the end of the baseline period/index date or closest to the end of the follow up interval window</p> <p><sup>b</sup> Change of K+ values closest to the end of the follow up interval and K+ values closest to the end of baseline period/index date.</p> |                   |               |       |
