# Supplementary material for: Assessing patiromer utilization and associated serum potassium changes in US veterans with prior sodium polystyrene sulfonate exposure
Source: PubMed Central journal article supplement — Medicine (Baltimore). 2023 Mar 3;102(9):e33134. doi: 10.1097/MD.0000000000033134 (PMC9981426; doi:10.1097/md.0000000000033134), 2023-03-03
Supplement: medi-102-e33134-s008.pdf [file medi-102-e33134-s008.pdf]

Supplemental Table 5. Summary of patiromer dispensing events and drug courses in patients with baseline serum potassium  $\geq 5.5$  mEq/L

|                                                                                               | Study Cohort<br>(n= 141)               |               |
|-----------------------------------------------------------------------------------------------|----------------------------------------|---------------|
|                                                                                               | <u>Mean</u>                            | <u>95% CI</u> |
| Patiromer dispensing events                                                                   | 2.85                                   | 2.53-3.17     |
| Cumulative dosage dispensed (g)                                                               | 1034.27                                | 857.85-1210.7 |
| Day supply per dispensing                                                                     | 36.75                                  | 33.13-40.37   |
|                                                                                               |                                        |               |
|                                                                                               | Patiromer treatment courses<br>(c=174) |               |
|                                                                                               | <u>Mean</u>                            | <u>95% CI</u> |
| Number of drug courses                                                                        | 1.23                                   | 1.16-1.31     |
|                                                                                               | <u>n</u>                               | <u>%</u>      |
| Patients with 1 course                                                                        | 109                                    | 77.3          |
| Patients with > 1 course                                                                      | 32                                     | 22.7          |
|                                                                                               | <u>Mean</u>                            | <u>95% CI</u> |
| Course duration (days)                                                                        | 73.73                                  | 65-82.46      |
| Average prescribed daily dose (g)                                                             | 9.64                                   | 8.99-10.29    |
| Average observed daily dose (g)                                                               | 9.96                                   | 8.97-10.94    |
| Course PDC                                                                                    | 0.95                                   | 0.94-0.96     |
|                                                                                               | <u>n</u>                               | <u>%</u>      |
| Censored course at the end of follow up time <sup>a</sup>                                     | 46                                     | 26.4          |
|                                                                                               |                                        |               |
| Median course duration (days)                                                                 | 62                                     | 57-70         |
| PDC = proportion of days covered                                                              |                                        |               |
| <sup>a</sup> Including active courses and courses with patient death date during drug course. |                                        |               |
