# Supplementary material for: Assessing patiromer utilization and associated serum potassium changes in US veterans with prior sodium polystyrene sulfonate exposure
Source: PubMed Central journal article supplement — Medicine (Baltimore). 2023 Mar 3;102(9):e33134. doi: 10.1097/MD.0000000000033134 (PMC9981426; doi:10.1097/md.0000000000033134), 2023-03-03

Supplemental Figure 4. Patiromer persistence probability for all courses in patients with baseline serum potassium  $\geq 5.5$  mEq/L

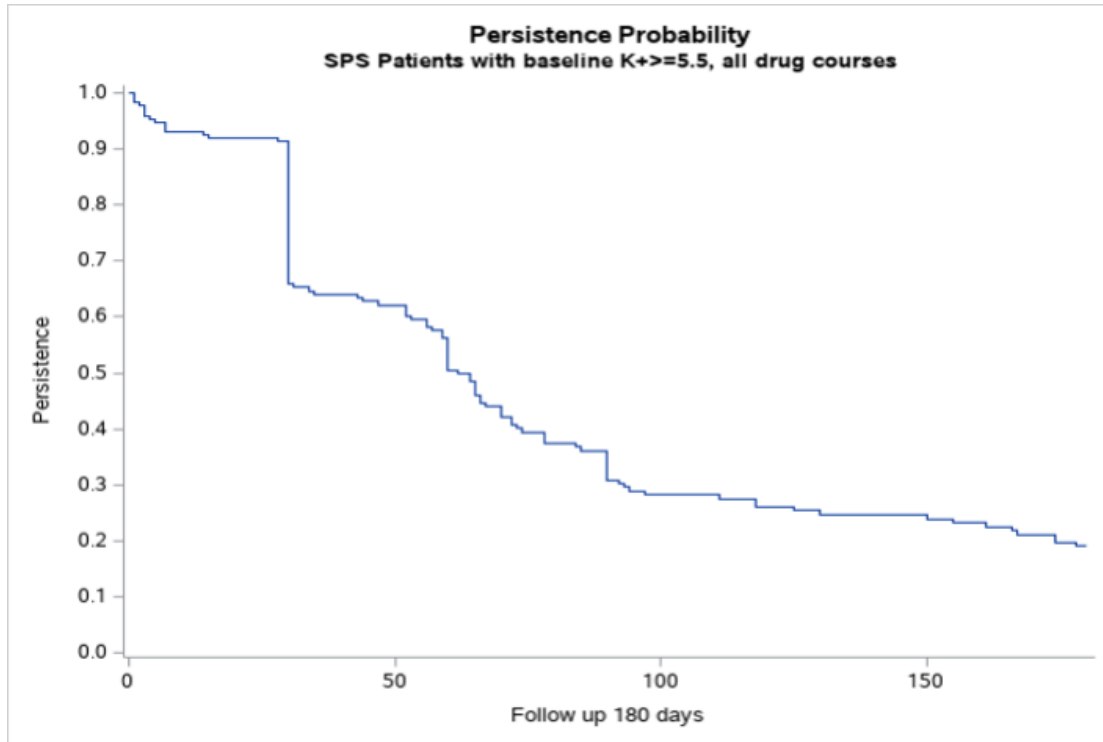

Supplement: medi-102-e33134-s009.pdf [file medi-102-e33134-s009.pdf]
