# Supplementary material for: Assessing patiromer utilization and associated serum potassium changes in US veterans with prior sodium polystyrene sulfonate exposure
Source: PubMed Central journal article supplement — Medicine (Baltimore). 2023 Mar 3;102(9):e33134. doi: 10.1097/MD.0000000000033134 (PMC9981426; doi:10.1097/md.0000000000033134), 2023-03-03
Supplement: medi-102-e33134-s010.pdf [file medi-102-e33134-s010.pdf]

Supplemental Table 6. Serum potassium distributions by category and study interval in patients with baseline serum potassium  $\geq 5.5$  mEq/L

| Baseline                             | Study Cohort<br>(n = 141) |                |         |
|--------------------------------------|---------------------------|----------------|---------|
|                                      | Mean (95% CI)             | Median (IQR)   | p-value |
| K+ value <sup>a</sup>                | 5.94 (5.87-6.01)          | 5.8 (5.6-6.2)  |         |
| K+ categories                        | n                         | %              |         |
| K+ 5.5 -5.9                          | 91                        | 64.5           |         |
| K+ $\geq 6.0$                        | 50                        | 35.5           |         |
| K+ Missing                           | 0                         | 0              |         |
| Follow up 1-30 days.                 |                           |                |         |
| K+ value <sup>a</sup>                | 4.98 (4.86-5.09)          | 4.9 (4.55-5.4) |         |
| K+ change from baseline <sup>b</sup> | -1.0 (0.87-1.14)          |                | <0.01   |
| K+ categories                        | n                         | %              |         |
| K+ < 3.5                             | 0                         | 0              |         |
| K+ 3.5 - 5.0                         | 57                        | 40.4           |         |
| K+ 5.1 - 5.4                         | 24                        | 17.0           |         |
| K+ 5.5 -5.9                          | 21                        | 14.9           |         |
| K+ $\geq 6.0$                        | 2                         | 1.4            |         |
| K+ Missing                           | 37                        | 26.2           |         |
| Follow up 31-91 days.                |                           |                |         |
| K+ value                             | 4.95 (4.85-5.06)          | 4.95 (4.6-5.3) |         |
| K+ change from baseline              | -1.0 (0.89-1.12)          |                | <0.01   |
| K+ categories                        | n                         | %              |         |
| K+ < 3.5                             | 0                         | 0              |         |
| K+ 3.5 - 5.0                         | 65                        | 46.1           |         |
| K+ 5.1 - 5.4                         | 23                        | 16.3           |         |
| K+ 5.5 -5.9                          | 12                        | 8.5            |         |
| K+ $\geq 6.0$                        | 6                         | 4.3            |         |
| K+ Missing                           | 35                        | 24.8           |         |
| Follow up 92-182 days.               |                           |                |         |
| K+ value                             | 4.89(4.77-5.01)           | 4.9 (4.5-5.3)  |         |
| K+ change from baseline              | -1.07 (0.93-1.21)         |                | <0.01   |

| K+ categories | n  | %    |  |  |
|---------------|----|------|--|--|
| K+ < 3.5      | 1  | 0.7  |  |  |
| K+ 3.5 - 5.0  | 72 | 51.1 |  |  |
| K+ 5.1 - 5.4  | 20 | 14.2 |  |  |
| K+ 5.5 -5.9   | 13 | 9.2  |  |  |
| K+ >= 6.0     | 7  | 5.0  |  |  |
| K+ Missing    | 28 | 19.9 |  |  |

<sup>a</sup> Average of K+ values that were closest to the end of the baseline period/index date or closest to the end of the follow up interval window

<sup>b</sup> Change of K+ values closest to the end of the follow up interval and K+ values closest to the end of baseline period/index date.
